# Supplementary material
Source: Springer Nature journal article supplement (https://www.springermedizin.de/resource/supplementary/12889_2010_3071_MOESM2_ESM.pdf/9487980)

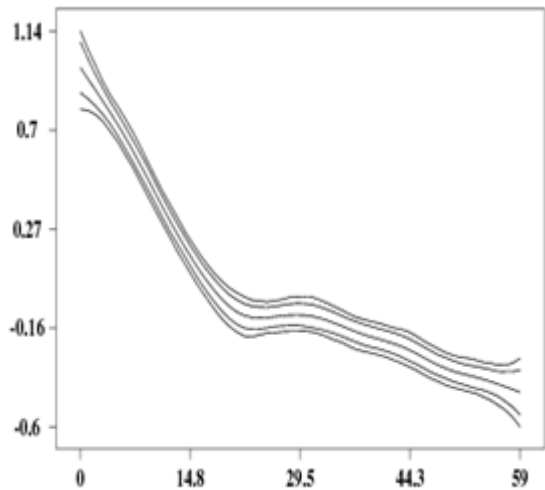

Child's age in month

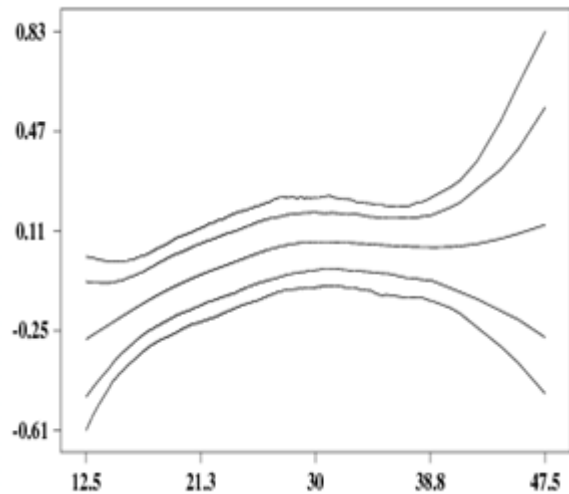

Mother's Body Mass Index (BMI)

Supplement: MOESM2 [file 9487980]
